# Supplementary material
Source: publisher figshare collection journal article supplement (https://gsajournals.figshare.com/ndownloader/files/23858480)
Supplement: Supplementary file 1 [file 23858480]

## Sheet: Values
Sample	[Glycogen] mg/mL	[Total Protein] mg/mL		glycogen/protein ratio
Mi/TM 1	0.077	1.213		0.063479
Mi/Tm 2	0.0796	1.057		0.0753075
Mi/Tm 3	0.0493	0.914		0.0539387
df/tm 1	0.1309	1.228		0.106596
mb/tm 1	0.1501	1.404		0.106909
mb/def 1	0.0926	1.326		0.0698341
mb/def 2	0.0819	1.614		0.0507435
mb/mi 1	0.0729	1.322		0.0551437
mb/mi 2	0.083	1.076		0.0771375
mb/tm 2	0.1423	1.565		0.0909265
mb/tm 3	0.1299	1.333		0.0974494
mb/mi 3	0.0599	1.075		0.0557209
mi/def 1	0.08	1.608		0.0497512
mi/ def 2	0.0888	1.488		0.0596774
mi/def 3	0.0751	1.523		0.0493106
mb/def 3	0.0755	1.283		0.0588465
df/tm 2	0.0751	1.067		0.0703843
df/tm 3	0.1047	1.24		0.0844355

## Sheet: 20160906
[Glucose] mg/mL	Absorbances					Average absorbance
0.01	0.021	0.021	0.019			0.0203333
0.02	0.033	0.031	0.048			0.0373333
0.04	0.066	0.073	0.061			0.0666667
0.08	0.119	0.111	0.114			0.114667
0.16	0.172	0.172	0.174			0.172667
[Glycogen] mg/mL	Absorbances					Average absorbance
0.01	0.013	0.012	0.013			0.0126667
0.02	0.019	0.023	0.022			0.0213333
0.04	0.039	0.039	0.038			0.0386667
0.08	0.076	0.076	0.073			0.075
0.16	0.124	0.13	0.139			0.131
Sample	Absorbances [glucose]					Average absorbance
Mi/TM 1	0.012	0.011	0.011	0.011	0.01	0.011	-0.00929164
Mi/Tm 2	0.015	0.018	0.018	0.02	0.03	0.0202	-9.99101e-05
Mi/Tm 3	0.017	0.021	0.011	0.016	0.014	0.0158	-0.00449595
Sample	Absorbances [glycogen]					Average absorbance	Total glycogen (1:5)	Total Glycogen
Mi/TM 1	0.032	0.028	0.03	0.03	0.029	0.0188	0.0154079	0.0770397	0.077
Mi/Tm 2	0.038	0.04	0.033	0.052	0.034	0.0192	0.0159131	0.0795655	0.0796
Mi/Tm 3	0.028	0.032	0.03	0.031	0.03	0.0144	0.00985097	0.0492549	0.0493
Sample	protein concentration readings					Average []mg/mL
Mi/TM 1	1.115	1.382	1.125	1.275	1.167	1.2128	1.213
Mi/Tm 2	1.072	1.128	1.061	0.943	1.081	1.057	1.057
Mi/Tm 3	0.985	0.876	0.916	0.908	0.884	0.9138	0.914

## Sheet: 20160913
[Glucose] mg/mL	Absorbances					Average absorbance
0.01	0.013	0.013	0.013			0.013
0.02	0.022	0.024	0.023			0.023
0.04	0.04	0.049	0.048			0.0456667
0.08	0.103	0.106	0.108			0.105667
0.16	0.162	0.161	0.169			0.164
[Glycogen] mg/mL	Absorbances					Average absorbance
0.01	0.004	0.001	0.007			0.004
0.02	0.012	0.011	0.01			0.011
0.04	0.027	0.026	0.027			0.0266667
0.08	0.055	0.058	0.062			0.0583333
0.16	0.121	0.121	0.121			0.121
Sample	Absorbances [glucose]					Average absorbance
df/tm 1	0.008	0.005	0.005	0.013	0.004	0.007	0.000582468	0.00291234
mb/tm 1	0.004	0.014	0.015	0.016	0.011	0.012	0.00543637	0.0271818
mb/def 1	0.013	0.008	0.009	0.009	0.01	0.0098	0.00330065	0.0165033
Sample	Absorbances [glycogen]					Average absorbance	Total glycogen (1:5)	Total Glycogen
df/tm 1	0.026	0.025	0.023	0.021	0.021	0.0162	0.0261814	0.130907	0.1309
mb/tm 1	0.028	0.035	0.033	0.029	0.031	0.0192	0.0300128	0.150064	0.1501
mb/def 1	0.02	0.021	0.023	0.019	0.017	0.0102	0.0185185	0.0925926	0.0926
Sample	protein concentration readings					Average []mg/mL
df/tm 1	0.991	1.211	1.241	1.339	1.36	1.2284	1.228
mb/tm 1	1.599	1.398	1.411	1.298	1.314	1.404	1.404
mb/def 1	1.503	1.407	1.243	1.373	1.104	1.326	1.326

## Sheet: 20160918
[Glucose] mg/mL	Absorbances					Average absorbance
0.01	0.017	0.02	0.015			0.0173333
0.02	0.03	0.029	0.026			0.0283333
0.04	0.06	0.059	0.059			0.0593333
0.08	0.111	0.112	0.109			0.110667
0.16	0.154	0.165	0.17			0.163
[Glycogen] mg/mL	Absorbances					Average absorbance
0.01	0.011	0.009	0.01			0.01
0.02	0.02	0.018	0.02			0.017
0.04	0.037	0.033	0.035			0.035
0.08	0.073	0.069	0.074			0.072
0.16	0.142	0.145	0.142			0.143
Sample	Absorbances [glucose]					Average absorbance
mb/def 2	0.013	0.017	0.013	0.015	0.012	0.014	-0.00102135	-0.00510673
mb/mi 1	0.014	0.015	0.017	0.017	0.022	0.017	0.00204269	0.0102135
mb/mi 2	0.01	0.014	0.01	0.011	0.01	0.011	-0.00408538	-0.0204269
mb/tm 2	0.012	0.014	0.012	0.015	0.01	0.0126	-0.00245123	-0.0122562
mb/tm 3	0.01	0.005	0.007	0.011	0.014	0.0094	-0.00571954	-0.0285977
Sample	Absorbances [glycogen]					Average absorbance	Total glycogen (1:5)	Total Glycogen
mb/def 2	0.031	0.028	0.032	0.026	0.026	0.0146	0.0163722	0.0818609	0.0819
mb/mi 1	0.032	0.033	0.026	0.031	0.028	0.013	0.0145829	0.0729143	0.0729
mb/mi 2	0.023	0.033	0.027	0.019	0.027	0.0148	0.0165958	0.0829792	0.083
mb/tm 2	0.038	0.039	0.037	0.036	0.04	0.0254	0.02845	0.14225	0.1423
mb/tm 3	0.034	0.036	0.028	0.032	0.033	0.0232	0.0259897	0.129949	0.1299
Sample	protein concentration readings					Average []mg/mL
mb/def 2	1.424	1.764	1.839	1.585	1.458	1.614	1.614
mb/mi 1	1.447	1.363	1.228	1.326	1.245	1.3218	1.322
mb/mi 2	1.252	0.962	1.015	0.964	1.189	1.0764	1.076
mb/tm 2	1.86	1.693	1.383	1.323		1.56475	1.565
mb/tm 3	1.288	1.335	1.061	1.457	1.526	1.3334	1.333

## Sheet: 20160919
[Glucose] mg/mL	Absorbances					Average absorbance
0.01	0.006	0.005	0.004			0.005
0.02	0.012	0.019	0.018			0.0163333
0.04	0.052	0.057	0.056			0.055
0.08	0.113	0.11	0.1			0.107667
0.16	0.162	0.161	0.161			0.161333
[Glycogen] mg/mL	Absorbances					Average absorbance
0.01	0.006	0.007	0.008			0.007
0.02	0.02	0.015	0.015			0.0166667
0.04	0.028	0.034	0.033			0.0316667
0.08	0.066	0.065	0.067			0.066
0.16	0.123	0.126	0.13			0.126333
Sample	Absorbances [glucose]					Average absorbance
mb/mi 3	0.015	0.011	0.01	0.009	0.009	0.0108	0.00639374
mi/def 1	0.01	0.01	0.014	0.015	0.013	0.0124	0.0079206
mi/ def 2	0.009	0.008	0.009	0.007	0.012	0.009	0.00467602
Sample	Absorbances [glycogen]					Average absorbance	Total glycogen (1:5)	Total Glycogen
mb/mi 3	0.024	0.012	0.02	0.022	0.022	0.0092	0.0119723	0.0598614	0.0599
mi/def 1	0.027	0.021	0.024	0.025	0.027	0.0124	0.016005	0.0800252	0.08
mi/ def 2	0.023	0.024	0.02	0.023	0.024	0.0138	0.0177694	0.0888469	0.0888
Sample	protein concentration readings					Average []mg/mL
mb/mi 3	0.97	0.658	1.102	0.954	1.003	0.9374	0.937
mi/def 1	1.595	1.842	1.431	1.558	1.612	1.6076	1.792
mi/ def 2	1.56	1.678	1.097	1.229	1.875	1.4878	1.659

## Sheet: 20160923
[Glucose] mg/mL	Absorbances					Average absorbance
0.01	0.019	0.014	0.014			0.0156667
0.02	0.038	0.029	0.032			0.033
0.04	0.055	0.057	0.056			0.056
0.08	0.102	0.108	0.102			0.104
0.16	0.142	0.138	0.139			0.139667
[Glycogen] mg/mL	Absorbances					Average absorbance
0.01	0.003	0.004	0.002			0.003
0.02	0.013	0.011	0.009			0.011
0.04	0.04	0.03	0.029			0.033
0.08	0.063	0.059	0.059			0.0603333
0.16	0.112	0.121	0.125			0.119333
Sample	Absorbances [glucose]					Average absorbance
mi/def 3	0.012	0.01	0.003	0.007		0.008
mb/def 3	0.008	0.011	0.008	0.007		0.0085
df/tm 2	0.007	0.01	0.008	0.007	0.001	0.008
df/tm 3	0.005	0.005	0.006	0.004	0.008	0.0056
Sample	Absorbances [glycogen]					Average absorbance	Total glycogen (1:5)	Total Glycogen
mi/def 3	0.017	0.019	0.016	0.017		0.00925	0.0150273	0.0751366	0.0751
mb/def 3	0.014	0.018	0.017	0.019	0.021	0.0093	0.0150924	0.0754619	0.0755
df/tm 2	0.017	0.018	0.016	0.018	0.014	0.00925	0.0150273	0.0751366	0.0751
df/tm 3	0.02	0.019	0.02	0.019	0.019	0.0138	0.0209472	0.104736	0.1047
Sample	protein concentration readings					Average []mg/mL
mi/def 3	1.484	1.592	1.596	1.421		1.52325	1.523
mb/def 3	1.486	1.239	1.186	1.222	1.282	1.283	1.283
df/tm 2	1.071	1.057	1.076	1.177	0.954	1.067	1.067
df/tm 3	1.393	1.333	1.028	1.417	1.028	1.2398	1.24
